# Supplementary material for: Opposite Sides of Pantoea agglomerans and Its Associated Commercial Outlook
Source: MDPI journal article supplement (doi:10.3390/microorganisms10102072), 2022-10-20
Supplement: s1 [file s1]

P.\_agglomerans\_LMAE-2  
P.\_agglomerans\_DAPP-PG734  
P.\_agglomerans\_KM1  
P.\_agglomerans\_BD\_1274  
P.\_agglomerans\_Pa  
P.\_agglomerans\_UAEU18  
P.\_agglomerans\_ANP8  
P.\_agglomerans\_4188  
P.\_agglomerans\_P5  
P.\_agglomerans\_Tx10  
P.\_agglomerans\_L15  
P.\_agglomerans\_P10c  
P.\_agglomerans\_Eh318  
P.\_agglomerans\_824-1  
P.\_agglomerans\_E325  
P.\_agglomerans\_C1  
P.\_agglomerans\_4  
P.\_agglomerans\_R190

|     |     |     |     |     |     |     |     |     |     |    |     |     |     |     |     |     |     |     |                           |
|-----|-----|-----|-----|-----|-----|-----|-----|-----|-----|----|-----|-----|-----|-----|-----|-----|-----|-----|---------------------------|
| 100 | 99  | 99  | 99  | 99  | 99  | 99  | 99  | 99  | 97  | 97 | 97  | 97  | 97  | 97  | 97  | 97  | 97  | 97  | P._agglomerans_LMAE-2     |
| 99  | 100 | 99  | 99  | 99  | 99  | 99  | 99  | 99  | 97  | 98 | 98  | 98  | 98  | 97  | 98  | 98  | 97  | 97  | P._agglomerans_DAPP-PG734 |
| 99  | 99  | 100 | 99  | 99  | 99  | 99  | 99  | 99  | 97  | 97 | 97  | 97  | 97  | 97  | 97  | 97  | 97  | 97  | P._agglomerans_KM1        |
| 99  | 99  | 99  | 100 | 99  | 99  | 99  | 99  | 99  | 97  | 97 | 97  | 97  | 98  | 97  | 97  | 97  | 97  | 97  | P._agglomerans_BD_1274    |
| 99  | 99  | 99  | 99  | 100 | 99  | 99  | 99  | 99  | 97  | 98 | 97  | 97  | 98  | 97  | 98  | 97  | 97  | 97  | P._agglomerans_Pa         |
| 99  | 99  | 99  | 99  | 99  | 100 | 99  | 99  | 99  | 97  | 97 | 97  | 97  | 97  | 97  | 97  | 97  | 97  | 97  | P._agglomerans_UAEU18     |
| 99  | 99  | 99  | 99  | 99  | 99  | 100 | 99  | 99  | 97  | 97 | 97  | 97  | 98  | 97  | 98  | 97  | 97  | 97  | P._agglomerans_ANP8       |
| 99  | 99  | 99  | 99  | 99  | 99  | 99  | 100 | 97  | 97  | 98 | 97  | 97  | 97  | 97  | 97  | 98  | 97  | 97  | P._agglomerans_4188       |
| 97  | 97  | 97  | 97  | 97  | 97  | 97  | 97  | 100 | 97  | 97 | 97  | 97  | 97  | 97  | 97  | 97  | 97  | 97  | P._agglomerans_P5         |
| 97  | 98  | 97  | 97  | 98  | 97  | 97  | 98  | 97  | 100 | 99 | 99  | 99  | 99  | 99  | 99  | 99  | 99  | 99  | P._agglomerans_Tx10       |
| 97  | 98  | 97  | 97  | 97  | 97  | 97  | 97  | 97  | 97  | 99 | 100 | 99  | 99  | 99  | 99  | 99  | 99  | 99  | P._agglomerans_L15        |
| 97  | 98  | 97  | 97  | 97  | 97  | 97  | 97  | 97  | 97  | 99 | 99  | 100 | 99  | 99  | 99  | 99  | 99  | 99  | P._agglomerans_P10c       |
| 97  | 98  | 97  | 98  | 98  | 97  | 98  | 97  | 97  | 97  | 99 | 99  | 99  | 100 | 99  | 99  | 99  | 99  | 99  | P._agglomerans_Eh318      |
| 97  | 97  | 97  | 97  | 97  | 97  | 97  | 97  | 97  | 97  | 99 | 99  | 99  | 99  | 100 | 99  | 98  | 99  | 98  | P._agglomerans_824-1      |
| 97  | 98  | 97  | 97  | 98  | 97  | 98  | 97  | 97  | 97  | 99 | 99  | 99  | 99  | 99  | 100 | 99  | 99  | 99  | P._agglomerans_E325       |
| 97  | 98  | 97  | 97  | 97  | 97  | 97  | 97  | 98  | 97  | 99 | 99  | 99  | 99  | 98  | 99  | 100 | 99  | 99  | P._agglomerans_C1         |
| 97  | 97  | 97  | 97  | 97  | 97  | 97  | 97  | 97  | 97  | 99 | 99  | 99  | 99  | 99  | 99  | 99  | 100 | 99  | P._agglomerans_4          |
| 97  | 97  | 97  | 97  | 97  | 97  | 97  | 97  | 97  | 97  | 99 | 99  | 99  | 99  | 98  | 99  | 99  | 99  | 100 | P._agglomerans_R190       |
